# Supplementary material
Source: PubMed Central journal article supplement (PMC4260453)
Supplement: NIHMS644248-supplement-Supporting_information.pdf [file NIHMS644248-supplement-Supporting_information.pdf]

# Supporting Information

## **Mismatch repair causes the dynamic release of an essential DNA polymerase from the replication fork**

Andrew D. Klocko, Jeremy W. Schroeder, Brian W. Walsh, Justin S. Lenhart, Margery L. Evans  
and Lyle A. Simmons\*

Department of Molecular, Cellular, and Developmental Biology  
University of Michigan, Ann Arbor, MI 48109

\*Corresponding Author

Mailing address: Department of Molecular, Cellular, and Developmental Biology, University of Michigan, Ann Arbor, Michigan 48109. Phone: (734) 647-2016. E-mail: lasimm@umich.edu  
Fax: (734) 647-0884.

Running Title: mismatch repair releases DnaE

Keywords: fluorescence, localization, mismatch repair, MutS, MutL, DnaE

**Table S1.** *Bacillus subtilis* strains used in this study.

| Strain | Relevant Genotype                                                                                    | Source or Reference             |
|--------|------------------------------------------------------------------------------------------------------|---------------------------------|
| PY79   | Prototroph, SPβ°                                                                                     | (Youngman <i>et al.</i> , 1984) |
| LAS440 | <i>mutS::mutS-gfp (spc); amyE::P<sub>spac</sub>mutL (cat)</i>                                        | (Smith <i>et al.</i> , 2001)    |
| LAS397 | <i>mutL::mutL-gfp (spc)</i>                                                                          | (Smith <i>et al.</i> , 2001)    |
| LAS257 | <i>dnaN::dnaN-mgfpA206K (spc)</i>                                                                    | (Simmons <i>et al.</i> , 2008)  |
| LAS385 | <i>dnaX::dnaX-gfp (spc)</i>                                                                          | (Smith <i>et al.</i> , 2001)    |
| AK151  | <i>holB::holB-gfp (spc)</i>                                                                          | (Lemon and Grossman, 1998)      |
| LAS267 | <i>lacA::P<sub>mps</sub>ssb-gfp (tet)</i>                                                            | (Berkmen and Grossman, 2006)    |
| LAS387 | <i>polC::polC-gfp (spc)</i>                                                                          | (Lemon and Grossman, 1998)      |
| AK74   | <i>amyE::P<sub>xyI</sub>dnaE-gfp (spc)</i>                                                           | (Dervyn <i>et al.</i> , 2001)   |
| LAS38  | <i>mutSL::kan</i>                                                                                    | (Simmons <i>et al.</i> , 2008)  |
| AK111  | <i>amyE::P<sub>xyI</sub>dnaE-gfp (spc); mutSL::kan</i>                                               | This work                       |
| AK121  | <i>mutL::kan</i>                                                                                     | This work                       |
| AK124  | <i>amyE::P<sub>xyI</sub>dnaE-gfp (spc); mutL::kan</i>                                                | This work                       |
| LAS40  | <i>recA::recA-mgfp (spc)</i>                                                                         | (Simmons <i>et al.</i> , 2009)  |
| JWS68  | <i>amyE::P<sub>xyI</sub>dnaE-gfp (spc); mutSL::kan; lacA::P<sub>spac</sub>mutL<sup>+</sup> (erm)</i> | This work                       |
| JSL203 | <i>amyE::P<sub>xyI</sub>dnaE-gfp (spc); mut-I[polC G430E,S621N] (cat)</i>                            | This work                       |
| BWW88  | <i>dnaE::dnaE-gfp (spc), ytsJ</i>                                                                    | This work                       |
| BWW96  | <i>dnaE::dnaE-mgfp (spc), ytsJ</i>                                                                   | This work                       |

All strains used are derivatives of PY79.

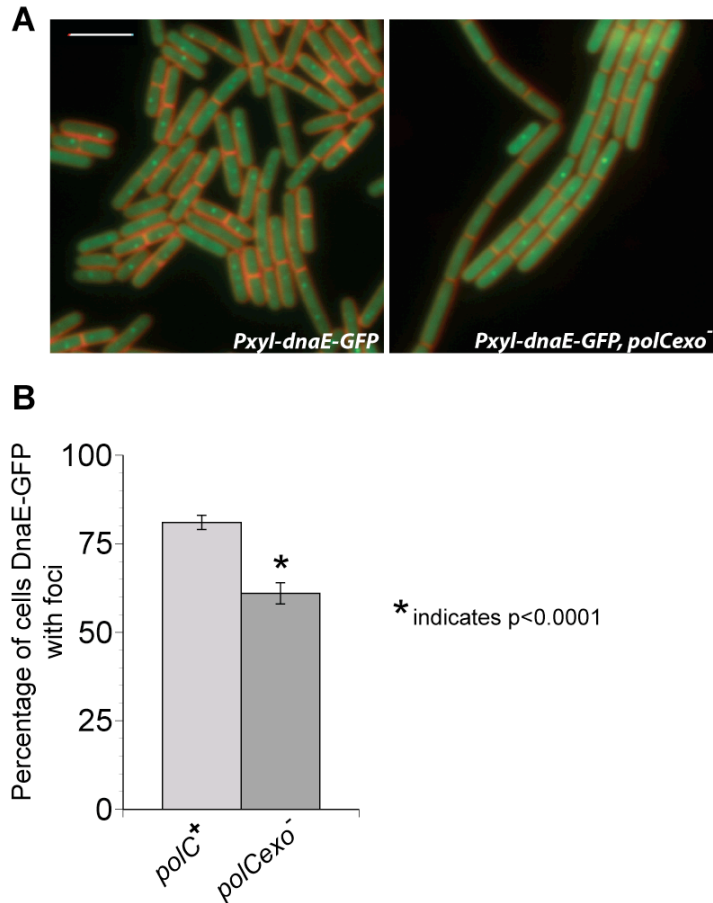

**Figure S1. The percentage of cells with DnaE-GFP foci decrease in a strain bearing a proofreading deficient *polC* allele.** The percentage of cells with DnaE-GFP foci were scored in an isogenic strain bearing the *polC mut-1* allele (Sanjanwala and Ganesan, 1991). This allele is defective in 3' to 5' exonuclease (Sanjanwala and Ganesan, 1991). (A) DnaE-GFP is shown in green while the membranes are pseudo-colored red and visualized with the vital membrane dye TMA-DPH. The wild type *polC* allele was used in the left panel, while the *polC mut-1* allele (*polCexo*<sup>-</sup>) was used in the right panel to evaluate the effect on DnaE-GFP foci. Exposure length for imaging DnaE-GFP was 500 ms while the TMA-DPH was imaged at 65 ms. (B) Shows a quantification of the percentage of cells with DnaE-GFP foci under the indicated conditions. The number of cells scored for *polC*<sup>+</sup> was 1644 cells and for DnaE-GFP scored in the *polC mut-1* background we scored 1101 cells. The asterisk indicates that the results are significant with  $p < 0.0001$ . The white bar indicates 4  $\mu$ m.

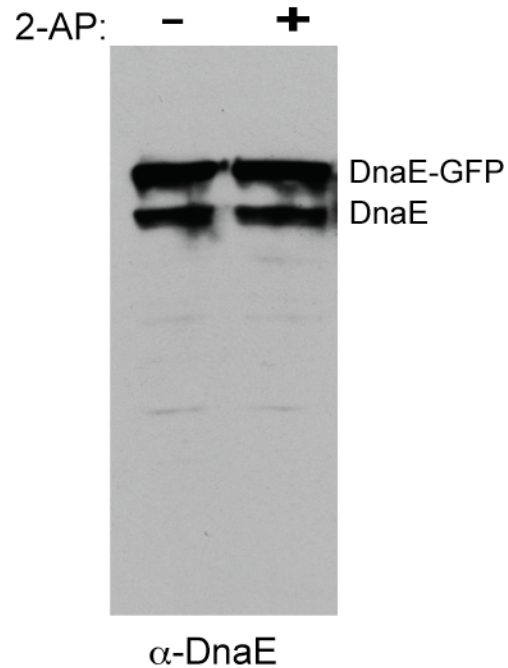

**Figure S2. DnaE and DnaE-GFP levels are unchanged following 2-AP challenge.**

Shown is an immunoblot of strain AK74 (relevant genotype *amyE::P<sub>xyI</sub> dnaE<sup>+</sup>, dnaE<sup>+</sup>*), +/- 2-AP treatment, as indicated above. Cells were grown to mid exponential phase optical density (OD<sub>600</sub>) of 0.4 in 0.125% D-xylose. The culture was split with one culture challenging with 600 μg/ml 2-AP for 1 hour while the control culture was grown in the absence of 2-AP challenge. Cells were harvested and processed as described (Rokop *et al.*, 2004). Cell load was normalized to cell number as determined by optical density between the samples shown. The anti-DnaE antiserum (MI1185) was used in 1:5000, the HRP-conjugated secondary goat anti-rabbit was used with a 1:5000 dilution (Pierce) as described in “Experimental Procedures.”

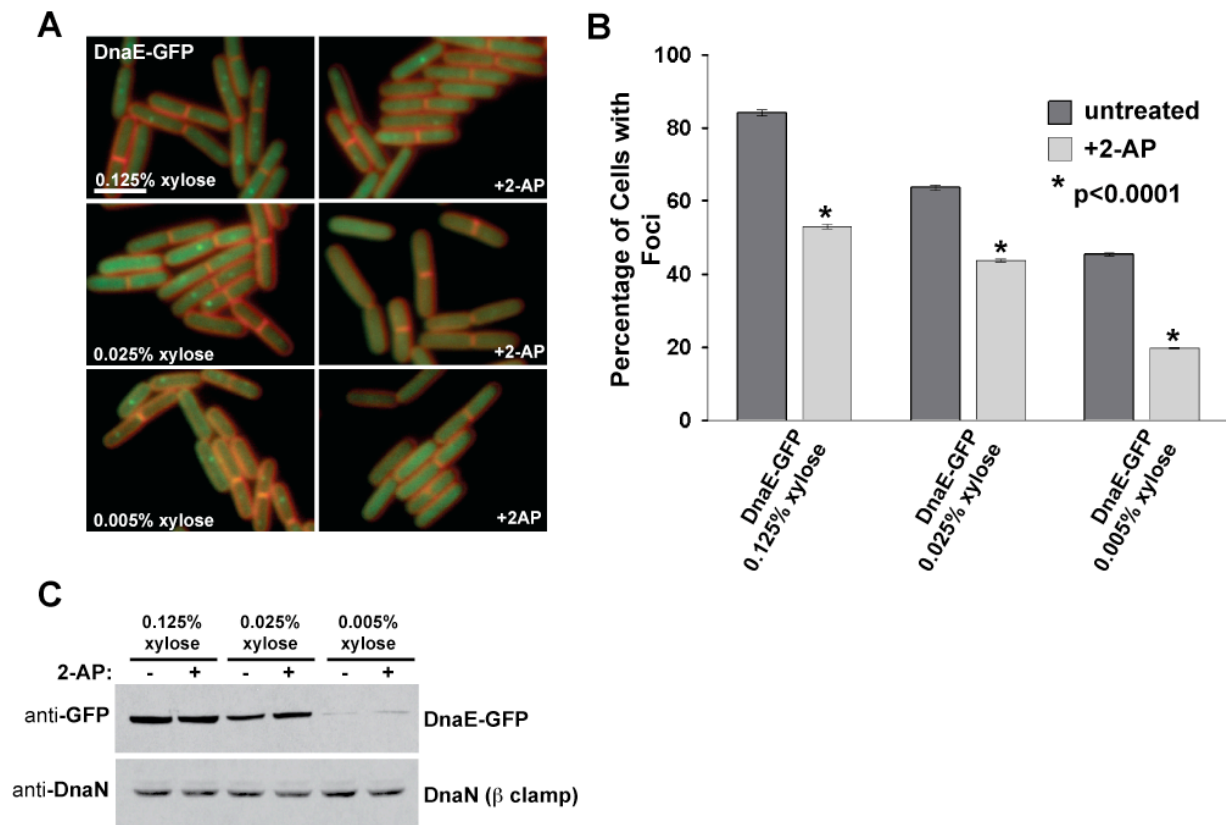

**Figure S3. 2-AP mediated loss of DnaE-GFP foci is independent of DnaE levels *in vivo*.** (A) DnaE-GFP with the indicated percentage of D-xylose added to the growth medium. The left panel is in the absence of 2-AP and the corresponding right panel is with 600  $\mu$ g/ml 2-AP. The membrane is stained with the vital membrane stain FM4-64 and the white bar indicates 3  $\mu$ m. The exposure time for DnaE-GFP in 0.125% xylose was 400 ms. We used longer exposures of 500 ms and 1000 ms to image the cells grown in 0.025% xylose and 0.005% xylose, respectively, for improved foci detection in these cells that contain lower levels of DnaE-GFP. (B) Bar graph of the percentage of cells with DnaE-GFP foci untreated (dark grey bars) and in the presence of 2-AP (light grey bars). The error bars reflect the 95% confidence interval. The asterisk indicates  $p < 0.0001$  between the untreated and 2-AP treated samples. The bar graph represents a summary of the complete data set shown in Table 3. (C) A representative immunoblot of DnaE-GFP and  $\beta$  clamp (DnaN) from cells with the amount of xylose and 2-AP indicated is shown.

## References

- Berkmen, M.B., and Grossman, A.D. (2006) Spatial and temporal organization of the *Bacillus subtilis* replication cycle. *Mol Microbiol* 62: 57-71.
- Dervyn, E., Suski, C., Daniel, R., Bruand, C., Chapuis, J., Errington, J., Janniere, L., and Ehrlich, S.D. (2001) Two essential DNA polymerases at the bacterial replication fork. *Science* 294: 1716-1719.
- Lemon, K.P., and Grossman, A.D. (1998) Localization of bacterial DNA polymerase: evidence for a factory model of replication. *Science* 282: 1516-1519.
- Rokop, M.E., Auchtung, J.M., and Grossman, A.D. (2004) Control of DNA replication initiation by recruitment of an essential initiation protein to the membrane of *Bacillus subtilis*. *Mol Microbiol* 52: 1757-1767.
- Sanjanwala, B., and Ganesan, A.T. (1991) Genetic structure and domains of DNA polymerase III of *Bacillus subtilis*. *Mol Gen Genet* 226: 467-472.
- Simmons, L.A., Davies, B.W., Grossman, A.D., and Walker, G.C. (2008) Beta clamp directs localization of mismatch repair in *Bacillus subtilis*. *Mol Cell* 29: 291-301.
- Simmons, L.A., Goranov, A.I., Kobayashi, H., Davies, B.W., Yuan, D.S., Grossman, A.D., and Walker, G.C. (2009) Comparison of responses to double-strand breaks between *Escherichia coli* and *Bacillus subtilis* reveals different requirements for SOS induction. *J Bacteriol* 191: 1152-1161.
- Smith, B.T., Grossman, A.D., and Walker, G.C. (2001) Visualization of mismatch repair in bacterial cells. *Mol. Cell* 8: 1197-1206.
- Youngman, P., Perkins, J.B., and Losick, R. (1984) Construction of a cloning site near one end of Tn917 into which foreign DNA may be inserted without affecting transposition in *Bacillus subtilis* or expression of the transposon-borne erm gene. *Plasmid* 12: 1-9.
